# Supplementary material for: Precision Medicine in Childhood Asthma: Omic Studies of Treatment Response
Source: Int J Mol Sci. 2020 Apr 21;21(8):2908. doi: 10.3390/ijms21082908 (PMC7215369; doi:10.3390/ijms21082908)
Supplement: Supplementary file 1 [file ijms-21-02908-s001.xlsx]

## Sheet: Table S1
Table S1. Group of keywords used in literature research.
Group 1	Group 2	Group 3	Group 4
asthma	children	pharmacogenomics	ICS
	pediatric	pharmacogenetics	corticosteroids
		gene	steroids
		polymorphism	OCS
		GWAS	LABA
		methylation	SABA
		epigenetics	adrenergic
		epigenomics	BDR
		miRNA	bronchodilator
		microbiome	LTRA
		metagenomics	leukotriene
		bacteria	SAMA
		metabolomics	LAMA
		metabolite	muscarinic
			antihistamine
			theophylline
			mepolizumab
			omalizumab
Abbreviations
ICS: inhaled corticosteroids; OCS: oral corticosteroids; GWAS: genome-wide association study; miRNA: micro ribonucleic acid; LABA: long-acting beta agonists; SABA: short-acting beta agonists; BDR: bronchodilator response; miRNA: micro ribonucleic acid; LTRA: leukotriene receptor antagonists; SAMA: short-acting muscarinic antagonists; LAMA: long-acting muscarinic antagonists

## Sheet: Table S2
Table S2. Main findings of the pharmacogenomics studies on childhood ashtma
												Discovery										Replication
Reference	PMID	Year of publication	Type of study	Definition of treatment response	Treatment considered	rsID/Chromosome band	Chromosome	Hg19 chromosome position	Gene/Nearest gene	Genotyping method	Effect allele	Sample size	Age group (years)	Population	Number of cases	Number of controls	β	Std error	OR	95% CI	p-value	Sample size	Age group (years)	Population	Number of cases	Number of controls	OR	p-value	Multiple comparison adjusment	Effect allele frequency in Africans	Effect allele frequency in Americans	Effect allele frequency in East Asians	Effect allele frequency Europeans	Effect allele frequency in South Asians
Spear et al.	30206298	2019	GWAS	BDR	SABA (Albuterol)	rs73650726	9	85152666	9q21	LAT1 array Affymetrix	A	949	Children and youth (8-21)	African American (SAGE I & SAGE II)	NA	NA	-3.8	0.66	NA	NA	7.69×10−9	247/149/1325/290	Children and adults (8-56)	Mexicans(GALA I)/PuertoRicans(GALA I)/African Americans (SAPPHIRE)/African Americans(SARP)	NA	NA	1.71/-6.22/-0.65/-6.12	0.87/0.11/0.49/0.04	Bonferroni GWAS threshold	A:0.91 / G:0.09	A:0.99 / G:0.01	A:1	A:1	A:1
Spear et al.	30206298	2019	GWAS	BDR	SABA (Albuterol)	rs7903366	10	53689774	PRKG1	LAT1 array Affymetrix	T	2779	Children and youth (8-21)	African American & Latino (SAGE I, SAGE II, & GALA II)	NA	NA	1.23	0.22	NA	NA	3.94×10−8	247/149/1325/290	Children and adults (8-56)	Mexicans(GALA I)/PuertoRicans(GALA I)/African Americans (SAPPHIRE)/African Americans(SARP)	NA	NA	1.02/-0.51/0.91/-0.27	0.3/0.61/0.10/0.83	Bonferroni GWAS threshold	C:0.33 / T:0.67	C:0.67 / T:0.33	C:0.52 / T:0.48	C:0.7 / T:0.3	C:0.52 / T:0.48
Spear et al.	30206298	2019	GWAS	BDR	SABA (Albuterol)	rs7070958	10	53691116	PRKG1	LAT1 array Affymetrix	A	2779	Children and youth (8-21)	African American & Latino (SAGE I, SAGE II, & GALA II)	NA	NA	-1.24	0.23	NA	NA	4.09×10−8	247/149/1325/290	Children and adults (8-56)	Mexicans(GALA I)/PuertoRicans(GALA I)/African Americans (SAPPHIRE)/African Americans(SARP)	NA	NA	1.04/-0.53/0.87/-0.4	0.29/0.6/0.11/0.76	Bonferroni GWAS threshold	A:0.33 / G:0.67	A:0.67 / G:0.33	A:0.52 / G:0.48	A:0.7 / G:0.3	A:0.52 / G:0.48
Spear et al.	30206298	2019	GWAS	BDR	SABA (Albuterol)	rs7081864	10	53690331	PRKG1	LAT1 array Affymetrix	A	2779	Children and youth (8-21)	African American & Latino (SAGE I, SAGE II, & GALA II)	NA	NA	1.23	0.22	NA	NA	4.94×10−8	247/149/1325/290	Children and adults (8-56)	Mexicans(GALA I)/PuertoRicans(GALA I)/African Americans (SAPPHIRE)/African Americans(SARP)	NA	NA	1.03/-0.53/0.84/-0.36	0.3/0.6/0.13/0.78	Bonferroni GWAS threshold	G:0.33 / A:0.67	G:0.67 / A:0.33	G:0.52 / A:0.48	G:0.7 / A:0.3	G:0.52 / A:0.48
Mak et al.	29509491	2018	WGS	BDR	SABA (Albuterol)	rs17834628	5	12978566	LINC01194, MIR4454, CTNND2, DNAH5	HiSeq x system (WGS)	A	1441	Children and youth (8-21)	African Americans/Mexicans/Puerto Ricans (GALA II & SAGE II)	715	726	NA	NA	1.67	1.29 - 2.16	1.18×10−8	2167	Children and adults	African Americans (SAPPHIRE, CHOP, SAGE I)/Mexicans (GALA I)/Puerto Ricans(HPR, GALA I)	845	1322	1.09	0.3	Bonferroni correction	G:0.87 / A:0.13	G:0.59 / A:0.41	G:0.76 / A:0.24	G:0.65 / A:0.35	G:0.66 / A:0.34
Mak et al.	29509491	2018	WGS	BDR	SABA (Albuterol)	rs35661809	5	12968341	LINC01194, MIR4454, CTNND2, DNAH5	HiSeq x system (WGS)	G	1441	Children and youth (8-21)	African Americans/Mexicans/Puerto Ricans (GALA II & SAGE II)	715	726	NA	NA	1.59	1.2 - 2.1	3.33×10−8	2167	Children and adults	African Americans (SAPPHIRE, CHOP, SAGE I)/Mexicans (GALA I)/Puerto Ricans(HPR, GALA I)	845	1322	0.94	0.59	Bonferroni correction	A:0.79 / G:0.21	A:0.57 / G:0.43	A:0.76 / G:0.24	A:0.65 / G:0.35	A:0.65 / G:0.35
Mak et al.	29509491	2018	WGS	BDR	SABA (Albuterol)	1p13.2	1	114177000:114178000	MAGI3 (intron 9), PHTF1, RSBN1	HiSeq x system (WGS)	NA	483	Children and youth (8-21)	Mexicans (SAGE II)	243	240	NA	NA	NA	NA	4.40×10-9	NA	NA	NA	NA	NA	NA	NA	Bonferroni correction	NA	NA	NA	NA	NA
Mak et al.	29509491	2018	WGS	BDR	SABA (Albuterol)	11p14.1	11	27507000:27508000	LOC105376671, LGR4, LIN7C	HiSeq x system (WGS)	NA	483	Children and youth (8-21)	Mexicans (SAGE II)	243	240	NA	NA	NA	NA	6.59×10-9	NA	NA	NA	NA	NA	NA	NA	Bonferroni correction	NA	NA	NA	NA	NA
Mak et al.	29509491	2018	WGS	BDR	SABA (Albuterol)	19p13.2	19	10424000:10425000	ZGLP1, ICAM5, FDX1L (intron 3), RAVER1	HiSeq x system (WGS)	NA	475	Children and youth (8-21)	African Americans (GALA II)	233	242	NA	NA	NA	NA	3.12×10-11	NA	NA	NA	NA	NA	NA	NA	Bonferroni correction	NA	NA	NA	NA	NA
Mak et al.	29509491	2018	WGS	BDR	SABA (Albuterol)	4q13.3	4	73478000:73479000	ADAMTS3, COX18	HiSeq x system (WGS)	NA	1441	Children and youth (8-21)	African Americans/Mexicans/Puerto Ricans (GALA II & SAGE II)	715	726	NA	NA	NA	NA	6.25×10-8	NA	NA	NA	NA	NA	NA	NA	Bonferroni correction	NA	NA	NA	NA	NA
Mak et al.	29509491	2018	WGS	BDR	SABA (Albuterol)	8q22.1	8	97926000:97927000	SDC2, CPQ (intron 4), LOC101927066, TSPYL5	HiSeq x system (WGS)	NA	1441	Children and youth (8-21)	African Americans/Mexicans/Puerto Ricans (GALA II & SAGE II)	715	726	NA	NA	NA	NA	1.32×10-7	NA	NA	NA	NA	NA	NA	NA	Bonferroni correction	NA	NA	NA	NA	NA
Hernandez-Pacheco et al.	30697902	2019	GWAS	Asthma exacerbations (ER visits/Hospitalizations/OCS)	ICS	rs5995653	22	39404249	APOBEC3B-APOBEC3C	Axiom LAT1 array (Discovery)	A	1347	Children and youth (8-21)	Hispanic/Latino/African American (GALA II & SAGE II)	823	524	NA	NA	0.66	0.56 - 0.79	4.8×10−6	1697	Children	Europeans (PiCA Consortium)	577	1120	0.76	7.52×10-3	Bonferroni correction	A:0.55 / G:0.45	A:0.28 / G: 0.72	A: 0.34 / G:0.66	A:0.32 / G:0.68	A:0.45 / G:0.55
Hernandez-Pacheco et al.	30697902	2019	GWAS	Asthma exacerbations (ER visits/Hospitalizations/OCS)	ICS	rs62081416	18	6605442	L3MBTL4-ARHGAP28	Axiom LAT1 array (Discovery)	A	NA	NA	NA	NA	NA	NA	NA	NA	NA	NA	1347	Children and youth (8-21)	Hispanic/Latino/African American (GALA II & SAGE II)	823	524	2.44	1.5×10-5	Bonferroni correction	G:0.96 / A:0.04	G:0.95 / A:0.06	G:0.89 / A:0.11	G:0.96 / A:0.04	G:0.82 / A:0.18
Hernandez-Pacheco et al.	30697902	2019	GWAS	FEV1 after 6 weeks of treatment with ICS	ICS	rs5995653	22	39404249	APOBEC3B-APOBEC3C	Axiom LAT1 array (Discovery)	A	NA	NA	NA	NA	NA	NA	NA	NA	NA	NA	166	Children and youth (8-21)	Hispanic/Latino/African American (GALA II & SAGE II)	NA	NA	2.16	4.91×10-3	Bonferroni correction	A:0.55 / G:0.45	A:0.28 / G: 0.72	A: 0.34 / G:0.66	A:0.32 / G:0.68	A:0.45 / G:0.55
Abbreviations
PMID: PubMed ID, rsID: reference SNP cluster ID; Std error: standard error; OR: Odds ratio; 95% CI: 95% confidence interval; GWAS: genome-wide association study; BDR: bronchodilator response; SABA: short-acting beta agonists; ER: emergency room; OCS: oral corticosteroids; FEV1: forced expiratory volume in the first second; NA: Not available

## Sheet: Table S3
Table S3. Main findings of epigenomics studies focused on DNA methylation in childhood asthma
											Discovery							Replication							Meta-analysis						Gene expression
Reference	PMID	Year of publication	Type of study	Definition of treatment response	Tissue	Treatment considered	CpG	Chromosome	Hg19 chromosome position	Gene/Nearest gene	Population	Age group (years)	Sample size	Cases	Controls	β	p-value	Population	Age group (years)	Sample size	Cases	Controls	β	p-value	Ethnicity	Sample size	Cases	Controls	q-value	Multiple comparison adjusment	Population	Gene	Pearson coefficient (ρ)	p-value
Wang et al.	31187518	2019	EWAS	ER visits/Hospitalizations	PBCs	ICS	cg00066816	5	158758353	IL12B	Non-Hispanic white (CAMP)	Children (5-12)	154	17	137	−3.101	0.002	Europeans (BAMSE)/Puerto Ricans (GACRS)	Children (8/6-14)	72/168	29/128	43/40	−2.953/−2.31	0.003/0.021	North American/EUR/Puerto Ricans	394	174	220	0.028	FDR	European	IL12B	0.34	0.01
Wang et al.	31187518	2019	EWAS	OCS	PBCs	ICS	cg00557354	13	111767899	ARHGEF7	Non-Hispanic white (CAMP)	Children (5-12)	154	67	80	−3.490	0.001	Puerto Ricans (GACRS)	Children (6-14)	168	108	60	−2.238	0.027	North American/Puerto Ricans	322	175	160	0.035	FDR
Wang et al.	31187518	2019	EWAS	OCS	PBCs	ICS	cg04256470	1	10510465	CORT, CENPS	Non-Hispanic white (CAMP)	Children (5-12)	154	67	80	3.62	<0.001	Puerto Ricans (GACRS)	Children (6-14)	168	108	60	2.329	0.021	North American/Puerto Ricans	322	175	160	0.035	FDR	North American	CORT	0.2	0.045
Wang et al.	31187518	2019	EWAS	OCS	PBCs	ICS	cg09495977	4	8271507	HTRA3	Non-Hispanic white (CAMP)	Children (5-12)	154	67	80	−2.420	0.017	Puerto Ricans (GACRS)	Children (6-14)	168	108	60	−3.466	0.001	North American/Puerto Ricans	322	175	160	0.035	FDR
Wang et al.	31187518	2019	EWAS	OCS	PBCs	ICS	cg12333095	12	110437035	ANKRD13A	Non-Hispanic white (CAMP)	Children (5-12)	154	67	80	−3.485	0.001	Puerto Ricans (GACRS)	Children (6-14)	168	108	60	−2.336	0.021	North American/Puerto Ricans	322	175	160	0.035	FDR
Wang et al.	31187518	2019	EWAS	OCS	PBCs	ICS	cg13818573	17	43045372	C1QL1	Non-Hispanic white (CAMP)	Children (5-12)	154	67	80	‐3.596	<0.001	Puerto Ricans (GACRS)	Children (6-14)	168	108	60	−2.163	0.032	North American/Puerto Ricans	322	175	160	0.035	FDR
Wang et al.	31187518	2019	EWAS	OCS	PBCs	ICS	cg21589280	1	85930152	DDAH1	Non-Hispanic white (CAMP)	Children (5-12)	154	67	80	−3.063	0.003	Puerto Ricans (GACRS)	Children (6-14)	168	108	60	−2.786	0.006	North American/Puerto Ricans	322	175	160	0.035	FDR
Wang et al.	31187518	2019	EWAS	OCS	PBCs	ICS	cg03080985	6	80340683	SH3BGRL2	Non-Hispanic white (CAMP)	Children (5-12)	154	67	80	−3.077	0.003	Puerto Ricans (GACRS)	Children (6-14)	168	108	60	−2.458	0.015	North American/Puerto Ricans	322	175	160	0.039	FDR
Wang et al.	31187518	2019	EWAS	OCS	PBCs	ICS	cg04330449	5	134871166	NEUROG1	Non-Hispanic white (CAMP)	Children (5-12)	154	67	80	−2.646	0.009	Puerto Ricans (GACRS)	Children (6-14)	168	108	60	−2.921	0.004	North American/Puerto Ricans	322	175	160	0.039	FDR
Wang et al.	31187518	2019	EWAS	OCS	PBCs	ICS	cg05307923	10	1779667	ADARB2	Non-Hispanic white (CAMP)	Children (5-12)	154	67	80	−2.577	0.011	Puerto Ricans (GACRS)	Children (6-14)	168	108	60	−2.959	0.004	North American/Puerto Ricans	322	175	160	0.039	FDR
Wang et al.	31187518	2019	EWAS	OCS	PBCs	ICS	cg08724517	4	156298205	MAP9	Non-Hispanic white (CAMP)	Children (5-12)	154	67	80	2.951	0.004	Puerto Ricans (GACRS)	Children (6-14)	168	108	60	2.653	0.009	North American/Puerto Ricans	322	175	160	0.039	FDR
Wang et al.	31187518	2019	EWAS	OCS	PBCs	ICS	cg11665562	14	90723462	PSMC1	Non-Hispanic white (CAMP)	Children (5-12)	154	67	80	−3.250	0.001	Puerto Ricans (GACRS)	Children (6-14)	168	108	60	−2.275	0.024	North American/Puerto Ricans	322	175	160	0.039	FDR
Wang et al.	31187518	2019	EWAS	OCS	PBCs	ICS	cg14269514	1	151736130	OAZ3, MRPL9	Non-Hispanic white (CAMP)	Children (5-12)	154	67	80	−3.112	0.002	Puerto Ricans (GACRS)	Children (6-14)	168	108	60	−2.246	0.026	North American/Puerto Ricans	322	175	160	0.043	FDR
Wang et al.	31187518	2019	EWAS	OCS	PBCs	ICS	cg24322623	11	17740431	MYOD1	Non-Hispanic white (CAMP)	Children (5-12)	154	67	80	−2.964	0.004	Puerto Ricans (GACRS)	Children (6-14)	168	108	60	−2.386	0.018	North American/Puerto Ricans	322	175	160	0.044	FDR
Wang et al.	31187518	2019	Interaction analysis (ICS vs Placebo)	ER visits/Hospitalizations	PBCs	ICS	cg00066816	5	158758353	IL12B	Non-Hispanic white (CAMP)	Children (5-12)	NA	154 (ICS)	222 (Placebo)	−3.051	0.002	NA	NA	NA	NA	NA	NA	NA	NA	NA	NA	NA	NA	NA
Wang et al.	31187518	2019	Interaction analysis (ICS vs Placebo)	OCS	PBCs	ICS	cg04256470	1	10510465	CORT, CENPS	Non-Hispanic white (CAMP)	Children (5-12)	NA	155 (ICS)	223 (Placebo)	2.322	0.02	NA	NA	NA	NA	NA	NA	NA	NA	NA	NA	NA	NA	NA
Wang et al.	30640894	2019	EWAS	Change in FEV1 after 8 weeks with ICS	PBCs	ICS	cg27254601	16	29817104	MAZ, BOLA2	Non-Hispanic white (CAMP)	Children (9)	152	NA	NA	3.5975	0.0005	NA	NA	NA	NA	NA	NA	NA	NA	NA	NA	NA	NA	None	Non-Hispanic white	BOLA2	0.25	0.02
Wang et al.	30640894	2019	EWAS	Change in FEV1 after 8 weeks with ICS	PBCs	ICS	cg15607672	14	57277228	OTX2	NA	NA	NA	NA	NA	NA	NA	Non-Hispanic white (CAMP)	Children (9)	152	NA	NA	2.1226	0.0363	NA	NA	NA	NA	NA	NA
Abbreviations
PMID: PubMed ID; EWAS: epigenome-wide association study; ER: emergency room; PBCs: Peripheral blood cells; ICS: inhaled corticosteroids; FDR: false discovery rate; OCS: oral corticosteroids; FEV1: forced expiratory volume in the first second; NA: not available

## Sheet: Table S4
Table S4. Main findings of the epigenomics studies focused on miRNA in childhood asthma
								Discovery
Reference	PMID	Year of publication	Type of study	Definition of treatment response	Tissue	Treatment considered	miRNA	Population	Age group (years)	Sample size	Cases	Controls	OR	95% CI	p-value
Kho et al.	29940952	2018	miRNA-profiling	OCS use	Serum	ICS	miR-206	Non-Hispanic white (CAMP)	Children (5-12)	153	38	115	0.6	0.42–0.83	0.004
Kho et al.	29940952	2018	miRNA-profiling	OCS use	Serum	ICS	miR-146b-5p	Non-Hispanic white (CAMP)	Children (5-12)	153	38	115	0.66	0.48–0.89	0.007
Kho et al.	29940952	2018	miRNA-profiling	OCS use	Serum	ICS	miR-222-3p	Non-Hispanic white (CAMP)	Children (5-12)	153	38	115	0.7	0.52–0.93	0.02
Kho et al.	29940952	2018	miRNA-profiling	OCS use	Serum	ICS	miR-409-3p	Non-Hispanic white (CAMP)	Children (5-12)	153	38	115	0.73	0.56–0.95	0.02
Kho et al.	29940952	2018	miRNA-profiling	OCS use	Serum	ICS	miR-223-5p	Non-Hispanic white (CAMP)	Children (5-12)	153	38	115	0.62	0.40-0.92	0.02
Kho et al.	29940952	2018	miRNA-profiling	OCS use	Serum	ICS	miR-126-5p	Non-Hispanic white (CAMP)	Children (5-12)	153	38	115	0.68	0.48–0.93	0.03
Kho et al.	29940952	2018	miRNA-profiling	OCS use	Serum	ICS	miR-339-3p	Non-Hispanic white (CAMP)	Children (5-12)	153	38	115	0.72	0.53-0.96	0.03
Kho et al.	29940952	2018	miRNA-profiling	OCS use	Serum	ICS	miR-30e-3p	Non-Hispanic white (CAMP)	Children (5-12)	153	38	115	0.7	0.49–0.95	0.03
Kho et al.	29940952	2018	miRNA-profiling	OCS use	Serum	ICS	miR-126-3p	Non-Hispanic white (CAMP)	Children (5-12)	153	38	115	0.74	0.56–0.96	0.03
Kho et al.	29940952	2018	miRNA-profiling	OCS use	Serum	ICS	miR-342-3p	Non-Hispanic white (CAMP)	Children (5-12)	153	38	115	0.8	0.64–0.98	0.04
Kho et al.	29940952	2018	miRNA-profiling	OCS use	Serum	ICS	miR-454-3p	Non-Hispanic white (CAMP)	Children (5-12)	153	38	115	0.77	0.60-0.98	0.04
Kho et al.	29940952	2018	miRNA-profiling	OCS use	Serum	ICS	miR-720	Non-Hispanic white (CAMP)	Children (5-12)	153	38	115	0.71	0.50–0.98	0.046
Abbreviations
PMID: PubMed ID; miRNA: micro ribonucleic acid; OR: odds ratio; 95% CI: 95% confidence interval; OCS: oral corticosteroids; ICS: inhaled corticosteroids
